# Supplementary material for: Rehydration before Application Improves Functional Properties of Lyophilized Lactiplantibacillus plantarum HAC03
Source: MDPI journal article supplement (doi:10.3390/microorganisms9051013), 2021-05-08
Supplement: s1 [file s1]

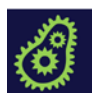

## Supplementary Material

Table S1. List of food additives according to the US FDA and their major classified function.

| Food additive          | Formula                                                                          | Molecular weight (g/mol) | Purity (%) | Weighted amount (g) | Rehydration concentration | Final test concentration | Brand              | Lot        | Major function class                                                                                                                                                                                                                  |
|------------------------|----------------------------------------------------------------------------------|--------------------------|------------|---------------------|---------------------------|--------------------------|--------------------|------------|---------------------------------------------------------------------------------------------------------------------------------------------------------------------------------------------------------------------------------------|
| Arabinose              | C <sub>5</sub> H <sub>10</sub> O <sub>5</sub>                                    | 150,13                   | 100,00     | 0,15                | 1M                        | 0,1M                     | USB                | 70047,000  | Flavor enhancer, flavoring agent or adjuvant                                                                                                                                                                                          |
| Xylose                 | C <sub>5</sub> H <sub>10</sub> O <sub>5</sub>                                    | 150,10                   | 99,00      | 0,15                | 1M                        | 0,1M                     | Sigma              | 053K00131  | Flavoring agent or adjuvant, nutritive sweetener                                                                                                                                                                                      |
| Rhamnose               | C <sub>6</sub> H <sub>12</sub> O <sub>5</sub> · H <sub>2</sub> O                 | 182,20                   | 99,00      | 0,18                | 1M                        | 0,1M                     | Sigma              | 058K0695   | Flavoring agent or adjuvant                                                                                                                                                                                                           |
| Mannose                | C <sub>6</sub> H <sub>12</sub> O <sub>6</sub>                                    | 180,16                   | 99,00      | 0,18                | 1M                        | 0,1M                     | Sigma              | BCBC4173V  | Flavoring agent or adjuvant                                                                                                                                                                                                           |
| Fructose               | C <sub>6</sub> H <sub>12</sub> O <sub>6</sub>                                    | 180,16                   | 100,00     | 0,18                | 1M                        | 0,1M                     | Sigma              | 125K01611  | Nutritive sweetener                                                                                                                                                                                                                   |
| Mannitol               | C <sub>6</sub> H <sub>14</sub> O <sub>6</sub>                                    | 182,17                   | 100,00     | 0,18                | 1M                        | 0,1M                     | Sigma              | 034K0061   | Anticaking agent or free-flow agent, flavor enhancer, flavoring agent or adjuvant, formulation aid, lubricant or release agent, non-nutritive sweetener, solvent or vehicle                                                           |
| Sucrose                | C <sub>12</sub> H <sub>22</sub> O <sub>11</sub>                                  | 342,30                   | 100,00     | 0,34                | 1M                        | 0,1M                     | Daejung            | S0784RE1   | Nutritive sweetener                                                                                                                                                                                                                   |
| Sorbitol               | C <sub>6</sub> H <sub>14</sub> O <sub>6</sub>                                    | 182,17                   | 97,00      | 0,19                | 1M                        | 0,1M                     | Daejung            | S0503QC1   | Color or coloring adjunct, drying agent, flavoring agent or adjuvant, humectant, nutrient supplement, nutritive sweetener, pH control agent, solvent or vehicle, stabilizer or thickener, texturizer                                  |
| Glucose                | C <sub>6</sub> H <sub>12</sub> O <sub>6</sub>                                    | 180,16                   | 99,50      | 0,18                | 1M                        | 0,1M                     | Sigma              | SLBS2877V  | Anticaking agent or free-flow agent, color or coloring adjunct, drying agent, flavor enhancer, flavoring agent or adjuvant, humectant, lubricant or release agent, nutritive sweetener, solvent or vehicle, stabilizer or thickener   |
| Maltose                | C <sub>12</sub> H <sub>22</sub> O <sub>11</sub> · H <sub>2</sub> O               | 360,31                   | 100,00     | 0,36                | 1M                        | 0,1M                     | USB                | 109469,000 | Nutritive sweetener                                                                                                                                                                                                                   |
| Trehalose              | C <sub>12</sub> H <sub>22</sub> O <sub>11</sub> · 2H <sub>2</sub> O              | 378,33                   | 99,00      | 0,38                | 1M                        | 0,1M                     | Sigma              | SLBV3123   | Flavoring agent or adjuvant                                                                                                                                                                                                           |
| Alginate acid          | (C <sub>5</sub> H <sub>7</sub> O <sub>6</sub> ) <sub>n</sub>                     | 10,00 – 600,00           | 100,00     | 0,30                | 1M                        | 0,1M                     | Sigma              | 127H0923   | Emulsifier, thickener, stabilizer                                                                                                                                                                                                     |
| Starch                 | (C <sub>6</sub> H <sub>10</sub> O <sub>5</sub> ) <sub>n</sub>                    | -                        | 100,00     | 0,30                | 1M                        | 0,1M                     | Daejung            | S0371PG1   | Anticaking agent or free-flow agent, drying agent, flavoring agent or adjuvant, formulation aid, humectant, non-nutritive sweetener, nutritive sweetener, solvent or vehicle, stabilizer or thickener, texturizer                     |
| Gelatin                | -                                                                                | -                        | -          | 0,02                | 2%                        | 0,2%                     | Daejung            | G0001PB1   | Anticaking agent or free-flow agent, drying agent, flavoring agent or adjuvant, formulation aid, humectant, processing aid, solvent or vehicle, stabilizer or thickener, surface-finishing agent, texturizer                          |
| Albumin                | -                                                                                | -                        | -          | 0,02                | 2%                        | 0,2%                     | Sigma              | SLBQ9036V  | Firming agent, formulation aid, nutrient supplement, processing aid, propellant, stabilizer or thickener, surface-active agent, surface-finishing agent, texturizer                                                                   |
| Pepsin                 | -                                                                                | -                        | -          | 0,02                | 2%                        | 0,2%                     | Sigma              | SLCC6249   | Enzyme                                                                                                                                                                                                                                |
| Peptone Soy            | -                                                                                | -                        | -          | 0,02                | 2%                        | 0,2%                     | Daejung            | P2758OH1   | Flavor enhancer, flavoring agent or adjuvant                                                                                                                                                                                          |
| Yeast extract          | -                                                                                | -                        | -          | 0,02                | 2%                        | 0,2%                     | BD Bacto           | 8015615    | Flavor enhancer, flavoring agent or adjuvant, malting or fermenting aid, nutrient supplement                                                                                                                                          |
| L-Arginine             | C <sub>6</sub> H <sub>14</sub> N <sub>4</sub> O <sub>2</sub>                     | 174,20                   | 98,00      | 0,18                | 1M                        | 0,1M                     | Sigma              | 017K0664   | Nutrient supplement                                                                                                                                                                                                                   |
| L-Tryptophan           | C <sub>11</sub> H <sub>12</sub> N <sub>2</sub> O <sub>2</sub>                    | 204,23                   | 99,00      | 0,21                | 1M                        | 0,1M                     | Kanto chemical co. | 403N2187   | Nutrient supplement                                                                                                                                                                                                                   |
| L-Phenylalanine        | C <sub>9</sub> H <sub>11</sub> NO <sub>2</sub>                                   | 165,19                   | 99,00      | 0,17                | 1M                        | 0,1M                     | Junsei             | 2012L1433  | Flavor enhancer, flavoring agent or adjuvant, nutrient supplement                                                                                                                                                                     |
| L-Ornithine            | C <sub>5</sub> H <sub>12</sub> N <sub>2</sub> O <sub>2</sub> · ClH               | 168,62                   | 99,00      | 0,17                | 1M                        | 0,1M                     | Sigma              | 109K1468   | Flavoring agent or adjuvant                                                                                                                                                                                                           |
| L- Glutamic acid       | C <sub>5</sub> H <sub>8</sub> NNaO <sub>4</sub> · 2H <sub>2</sub> O              | 169,11                   | 99,00      | 0,17                | 1M                        | 0,1M                     | Sigma              | SLBF7449V  | Flavoring agent or adjuvant, nutrient supplement                                                                                                                                                                                      |
| L-Proline              | C <sub>5</sub> H <sub>9</sub> NO <sub>2</sub>                                    | 115,10                   | 100,00     | 0,12                | 1M                        | 0,1M                     | Sigma              | 72H0774    | Flavor enhancer, flavoring agent or adjuvant, nutrient supplement                                                                                                                                                                     |
| L-Lysine               | C <sub>6</sub> H <sub>14</sub> N <sub>2</sub> O <sub>2</sub> · HCl               | 182,65                   | 98,00      | 0,19                | 1M                        | 0,1M                     | Sigma              | 108K1321   | Nutrient supplement                                                                                                                                                                                                                   |
| L-Serine               | C <sub>3</sub> H <sub>7</sub> NO <sub>3</sub>                                    | 105,09                   | 99,00      | 0,11                | 1M                        | 0,1M                     | Georgiachem        | S454621R   | Flavor enhancer, flavoring agent or adjuvant, nutrient supplement                                                                                                                                                                     |
| L-Threonine            | C <sub>4</sub> H <sub>9</sub> NO <sub>3</sub>                                    | 119,12                   | 99,00      | 0,12                | 1M                        | 0,1M                     | Georgiachem        | T262958H   | Flavor enhancer, flavoring agent or adjuvant, nutrient supplement                                                                                                                                                                     |
| L-Aspartic Acid        | C <sub>4</sub> H <sub>7</sub> NO <sub>4</sub>                                    | 133,10                   | 99,00      | 0,13                | 1M                        | 0,1M                     | Georgiachem        | A977123A   | Flavor enhancer, flavoring agent or adjuvant, nutrient supplement                                                                                                                                                                     |
| L-Tyrosine             | C <sub>9</sub> H <sub>11</sub> NO <sub>3</sub>                                   | 181,19                   | 99,00      | 0,18                | 1M                        | 0,1M                     | Samchun chemicals  | 101917     | Flavoring agent or adjuvant, nutrient supplement                                                                                                                                                                                      |
| L-Histidine            | C <sub>6</sub> H <sub>9</sub> N <sub>3</sub> O <sub>2</sub>                      | 209,64                   | 99,00      | 0,21                | 1M                        | 0,1M                     | Daejung            | H2821RL1   | Flavor enhancer, flavoring agent or adjuvant, nutrient supplement                                                                                                                                                                     |
| Sodium Phosphate       | Na <sub>2</sub> HPO <sub>4</sub>                                                 | 141,96                   | 99,00      | 0,14                | 1M                        | 0,1M                     | Sigma              | 075K2520   | Anticaking agent or free-flow agent, antimicrobial agent, drying agent, emulsifier or emulsifier salt, flavor enhancer, flavoring agent or adjuvant, malting or fermenting aid, pH control agent, stabilizer or thickener, texturizer |
| Sodium L-tartrate      | C <sub>4</sub> H <sub>4</sub> Na <sub>2</sub> O <sub>6</sub> · 2H <sub>2</sub> O | 230,08                   | 99,00      | 0,23                | 1M                        | 0,1M                     | Sigma              | 07425BC    | Emulsifier or emulsifier salt, pH control agent, sequestrant                                                                                                                                                                          |
| Sodium bicarbonate     | NaHCO <sub>3</sub>                                                               | 84,01                    | 99,80      | 0,08                | 1M                        | 0,1M                     | Yakuri             | 312132812  | Emulsifier or emulsifier salt, flavor enhancer, flavoring agent or adjuvant, leavening agent, nutrient supplement, pH control agent, processing aid, solvent or vehicle                                                               |
| Malic acid             | C <sub>4</sub> H <sub>6</sub> O <sub>5</sub>                                     | 134                      | 98,00      | 0,14                | 1M                        | 0,1M                     | Sigma              | SLBS7651   | Flavor enhancer, flavoring agent or adjuvant, pH control agent, synergist                                                                                                                                                             |
| Pyruvic acid           | C <sub>3</sub> H <sub>4</sub> O <sub>3</sub>                                     | 80,06                    | 100,00     | 0,06                | 1M                        | 0,1M                     | Daejung            | P3470SG1   | Flavoring agent or adjuvant                                                                                                                                                                                                           |
| Betaine                | C <sub>5</sub> H <sub>11</sub> NO <sub>2</sub>                                   | 117,15                   | 98,00      | 0,12                | 1M                        | 0,1M                     | Daejung            | B1549PE1   | Flavoring agent or adjuvant                                                                                                                                                                                                           |
| Taurine                | C <sub>2</sub> H <sub>7</sub> NO <sub>3</sub> S                                  | 125,15                   | 99,00      | 0,13                | 1M                        | 0,1M                     | Sigma              | 12515DU    | Flavoring agent or adjuvant                                                                                                                                                                                                           |
| Riboflavin             | C <sub>17</sub> H <sub>20</sub> N <sub>4</sub> O <sub>6</sub>                    | 376,37                   | 100,00     | 0,19                | 1M                        | 0,1M                     | Sigma              | 069k1585   | Color or coloring adjunct, flavor enhancer, flavoring agent or adjuvant, nutrient supplement                                                                                                                                          |
| Thiamine hydrochloride | C <sub>12</sub> H <sub>17</sub> ClN <sub>4</sub> O <sub>4</sub> · HCl            | 337,27                   | 98,00      | 0,17                | 1M                        | 0,1M                     | Daejung            | T0027QL1   | Flavoring agent or adjuvant, nutrient supplement                                                                                                                                                                                      |
| L- Ascorbic acid       | C <sub>6</sub> H <sub>8</sub> O <sub>6</sub>                                     | 176,12                   | 99,00      | 0,18                | 1M                        | 0,1M                     | TCI                | KNBGE      | Antimicrobial agent, antioxidant, color or coloring adjunct, dough strengthener, flavor enhancer, flavoring agent or adjuvant, nutrient supplement, pH control agent, sequestrant, stabilizer or thickener                            |

**Table S2.** Main components declared on selected commercial probiotics in South Korea and the Philippines.

| Product type     | Declared microorganisms*                             | Country of origin | Formulations / ingredients                                                                                                                                                              |
|------------------|------------------------------------------------------|-------------------|-----------------------------------------------------------------------------------------------------------------------------------------------------------------------------------------|
| Tablet           | * <i>L. reuteri</i> DSM 17938                        | Sweden            | Isomaltose, xylitol, palm oil, calcium stearate, strawberry flavor, citric acid.                                                                                                        |
| Soft gel capsule | <i>B. breve</i> subsp. <i>breve</i> M-16v            | Japan             | Oligosaccharides, amino acids, vitamin B6, B12, B3, niacinamide, folic acid, pantothenic acid, biotin, inositol, riboflavin, iron, potassium, phosphorus, sodium                        |
|                  | <i>B. infantis</i> subsp. <i>infantis</i> M-63       |                   |                                                                                                                                                                                         |
|                  | <i>B. longum</i> BB536                               |                   |                                                                                                                                                                                         |
|                  | <i>E. faecalis</i> TH10                              |                   |                                                                                                                                                                                         |
|                  | <i>L. acidophilus</i> ATCC SD5212                    |                   |                                                                                                                                                                                         |
|                  | <i>L. brevis</i> NBRC 3345                           |                   |                                                                                                                                                                                         |
|                  | <i>L. bulgaricus</i> NBRC 13953                      |                   |                                                                                                                                                                                         |
|                  | <i>Lc. casei</i> TO-A                                |                   |                                                                                                                                                                                         |
| Powder           | <i>L. fermentum</i> NBRC 3071                        | Denmark           | Mannitol, inulin, silicon dioxide                                                                                                                                                       |
|                  | <i>L. helveticus</i> subsp. <i>jugurti</i> BBRC 3809 |                   |                                                                                                                                                                                         |
|                  | <i>Lp. plantarum</i> TO-A                            |                   |                                                                                                                                                                                         |
|                  | <i>S. thermophilus</i> NBRC1397                      |                   |                                                                                                                                                                                         |
|                  | <i>Lc. rhamnosus</i> GG and PXN 54                   |                   |                                                                                                                                                                                         |
| Powder           | <i>Lc. casei</i> PXN 37                              | United Kingdom    | Fructo-oligosaccharides (FOS)                                                                                                                                                           |
|                  | <i>S. thermophilus</i> PXN 66                        |                   |                                                                                                                                                                                         |
|                  | <i>B. breve</i> PXN 25                               |                   |                                                                                                                                                                                         |
|                  | <i>L. acidophilus</i> PXN 35                         |                   |                                                                                                                                                                                         |
|                  | <i>B. infantis</i> (child specific) PXN 27           |                   |                                                                                                                                                                                         |
| Powder           | <i>L. bulgaricus</i> PXN 39                          | South Korea       | Vegetable cream, FOS, yogurt powder flavor                                                                                                                                              |
|                  | <i>L. acidophilus</i>                                |                   |                                                                                                                                                                                         |
|                  | <i>B. longum</i>                                     |                   |                                                                                                                                                                                         |
| Powder           | <i>B. bifidum</i> BGN4                               | South Korea       | FOS, maltose, galacto-oligosaccharide, corn powder, seaweed calcium, vitamin-mineral mix, aloe.                                                                                         |
|                  | <i>B. longum</i> BORI                                |                   |                                                                                                                                                                                         |
|                  | <i>L. acidophilus</i> A031                           |                   |                                                                                                                                                                                         |
|                  | <i>E. faecium</i> BH06                               |                   |                                                                                                                                                                                         |
| Gummy candies    | <i>Lc. lactis</i>                                    | South Korea       | Sucrose, starch syrup, D-Sorbitol, gelatin, yogurt flavor, citric acid, titanium dioxide, pectin, coating oil, carnauba wax, soybean phospholipids trisodium citrate, skim milk, stevia |
|                  | <i>S. thermophilus</i>                               |                   |                                                                                                                                                                                         |
|                  | <i>E. faecium</i>                                    |                   |                                                                                                                                                                                         |
|                  | <i>L. plantarum</i>                                  |                   |                                                                                                                                                                                         |

\* The nomenclature of the former genus *Lactobacillus* has been retained in the Table as given in the product labels. Full information on the new genera can be obtained from: Zheng et al. (2020). A taxonomic note on the genus *Lactobacillus*: Description of 23 novel genera, emended description of the genus *Lactobacillus* Beijerinck 1901, and union of *Lactobacillaceae* and *Leuconostocaceae*. *Int. J. System. Evol. Microbiol.* **70**: 2782-2858. DOI 10.1099/ijsem.0.004107.
